# Supplementary material for: A novel electrochemical sensor based on a Cu-coordinated molecularly imprinted polymer and MoS2 modified chitin-derived carbon for selective detection of dextromethorphan
Source: Royal Society of Chemistry journal article supplement (doi:10.1039/d4ay00549j), 2024-01-01
Supplement: d4ay00549j1.pdf [file d4ay00549j1.pdf]

**1            A novel electrochemical sensor based on Cu-coordinated**  
**2        molecularly imprinted polymer and MoS<sub>2</sub> modified chitin-**  
**3        derived carbon for selective detection of dextromethorphan**

**4** Jingxia Yuan, Shulei Wang, Siying Cheng, Yiwei Liu, Faqiong Zhao, Baizhao Zeng\*  
**5** *College of Chemistry and Molecular Sciences, Wuhan University, Wuhan 430072,*  
**6** *Hubei Province, P. R. China*

\*Corresponding author. Tel: 86-27-68752701, Fax: 86-27-68754067.

E-mail address: bzzeng@whu.edu.cn (BZ Zeng)

## 7        **Materials and reagents**

8        Dextromethorphan cough syrup and cough tablets were purchased from local  
9        pharmacies. Healthy human serum was purchased from Fusheng Industry Co., Ltd.  
10       (Shanghai, China). Human urine samples were collected from laboratory personnel.

11        $\text{CuCl}_2 \cdot 2\text{H}_2\text{O}$ , methanol, acetic acid, NaOH, anhydrous ethanol, potassium  
12       ferricyanide ( $\text{K}_3[\text{Fe}(\text{CN})_6]$ ), potassium ferrocyanide trihydrate ( $\text{K}_4[\text{Fe}(\text{CN})_6] \cdot 3\text{H}_2\text{O}$ ),  
13       glucose (Glu), ascorbic acid (AA), urea, uric acid (UA), NaBr and  $\text{KNO}_3$  were  
14       obtained from China National Pharmaceutical Group Chemical Reagent Company  
15       (Shanghai, China). Hydrobromide dextromethorphan (DXM), chitin, phytic acid  
16       (50%), carbon bisulfide, ammonium tetrathiomolybdate, hydrogen peroxide (30%),  
17       anhydrous 1,10-phenanthroline, guaiacol, ketoprofen (KP) and ibuprofen (IBP) were  
18       purchased from Aladdin Chemical Reagent Co., Ltd. (Shanghai, China).

## 19       **Instruments and apparatus**

20       ZEISS field emission scanning electron microscope (SEM, Zeiss Gemini SEM  
21       500) was used to characterize the morphology of the materials. The X-ray diffraction  
22       (XRD) measurements were performed with a Bruker D8 diffractometer (Germany)  
23       using  $\text{Cu K}\alpha$  radiation (40 KV, 40 mA). XRD spectra were recorded within  $2\theta$  range  
24       of  $10\text{--}80^\circ$  at a scan rate of  $5.0^\circ \text{ min}^{-1}$ . X-ray photoelectron spectroscopy (XPS) was  
25       obtained with ESCALAB 250Xi spectrometer (Thermo Fisher Scientific Inc,  
26       America). Survey scan spectra were recorded using a pass energy of 100 eV and a 1  
27       eV step. Narrow scans of single regions were acquired using a pass energy of 30 eV  
28       and a 0.05 eV step. The UV–Vis spectra were collected by a UV-3600  
29       spectrophotometer (Shimadzu Corporation, Japan). Fourier transform infrared (FT-IR)  
30       spectra were acquired on a FT-IR5700 (Thermo Fisher Scientific, USA) in the  
31       wavenumber range of  $400\text{--}4000 \text{ cm}^{-1}$ .

32       Electrochemical experiments were conducted on a CHI830D electrochemical  
33       workstation (Chenhua, Shanghai, China), employing a conventional three-electrode  
34       system. For electrochemical experiments, a modified GCE (diameter 3 mm), platinum

35 wire electrode, and Ag/AgCl electrode were used as the working electrode, auxiliary  
36 electrode, and reference electrode.

### 37        **Preparation of DXM working standard solution**

38        The standard working solution of DXM (1 mM) was prepared using PBS  
39 (pH=7.0). The standard working solution was stored in the dark at 4 °C, and it was  
40 diluted with PBS solution before use. The working solution with the same  
41 concentration was analyzed three times repeatedly for the study of linear calibration  
42 curve.

### 43        **High performance liquid chromatography analysis**

44        Use LC-20AT with a UV-visible detector for HPLC detection, which was set at  
45 280 nm for DXM analysis. In the HPLC system, chromatographic separation was  
46 carried out by a mobile phase consisting of acetonitrile-water-acetic acid (100: 100: 1)  
47 on Inersustain®C18 (average particle size: 5 µm, 250×4.6 mm inner diameter). The  
48 flow rate was 1.0 mL min<sup>-1</sup>. The injection volume was 20 µL and the column  
49 temperature was kept at 30 °C.

### 50        **Estimation of electroactive surface areas**

51        The effective surface area of each electrode was calculated using the Randles-  
52 Sevcik equation<sup>1</sup>:

$$53 \quad I_p = 2.69 \times 10^5 n^{3/2} A C D^{1/2} \nu^{1/2} \quad (\text{Eq. S1})$$

54        Where:

55         $I_p$  is the peak current.

56         $n$  is the number of electrons involved in the oxidation-reduction reaction ( $n=1$ ) .

57         $A$  is the active surface area of the electrode.

58         $D$  is the diffusion coefficient of  $\text{K}_3\text{Fe}(\text{CN})_6$  ( $6.73 \times 10^{-6} \text{ cm}^2 \text{ s}^{-1}$ ).

59         $C$  is the volume concentration of  $\text{K}_3\text{Fe}(\text{CN})_6$ .

60         $\nu$  is the scan rate. (100 mV s<sup>-1</sup>)

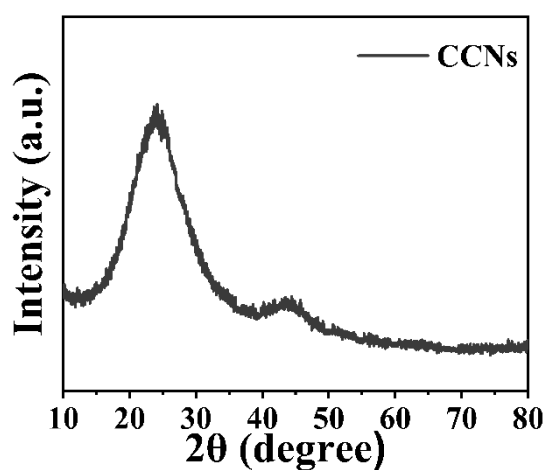

61

62 Fig. S1. XRD pattern of CCNs.

63

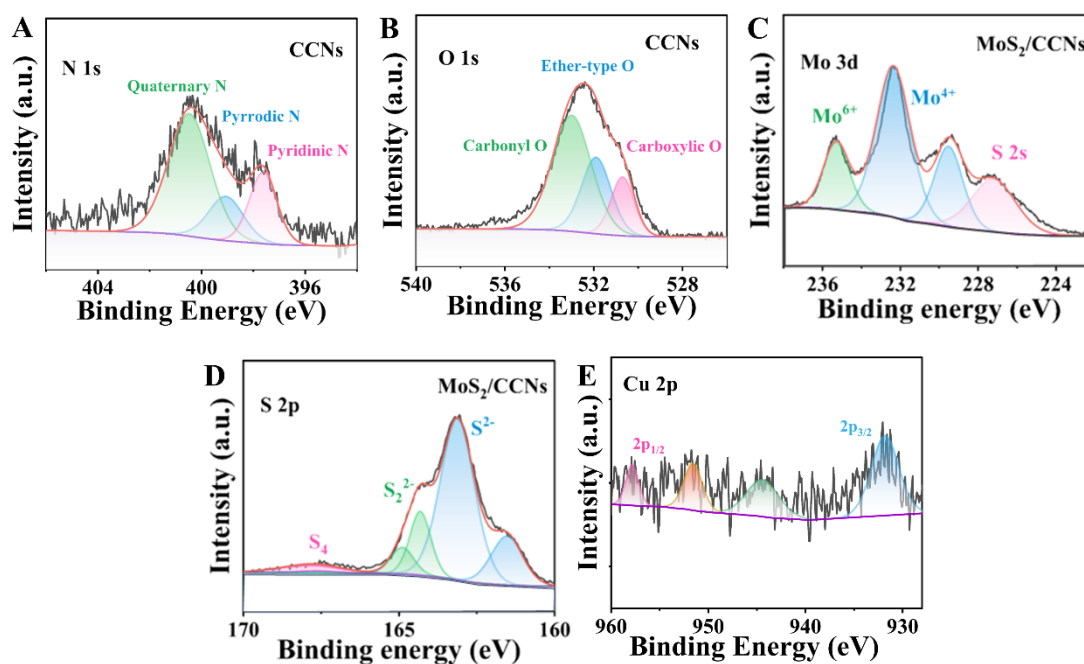

64

65 Fig. S2. XPS high-resolution spectra of (A) N 1s, (B) O 1s in CCNs samples and (C)

66 Mo 3d, (D) S 2p in MoS<sub>2</sub>/CCNs samples, (E) Cu 2p in Cu-MIP after

67 electropolymerization and elution process.

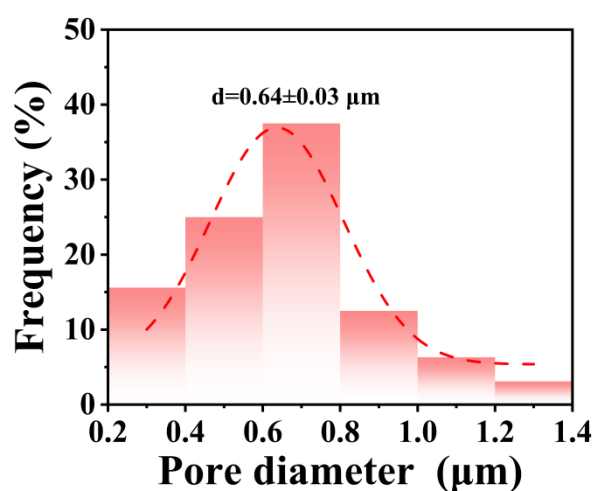

68

69 **Fig. S3.** Statistical histogram of the pore size distribution derived from the cross-  
70 sections on the SEM image.

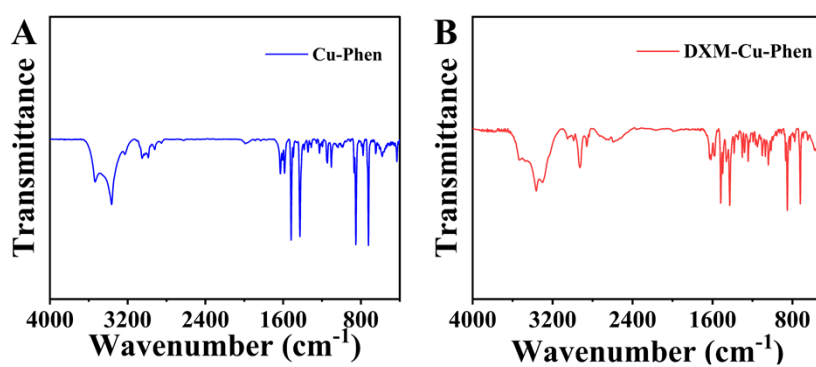

71

72 **Fig. S4.** FT-IR spectra of (A) Cu-Phen and (B) DXM-Cu-Phen.

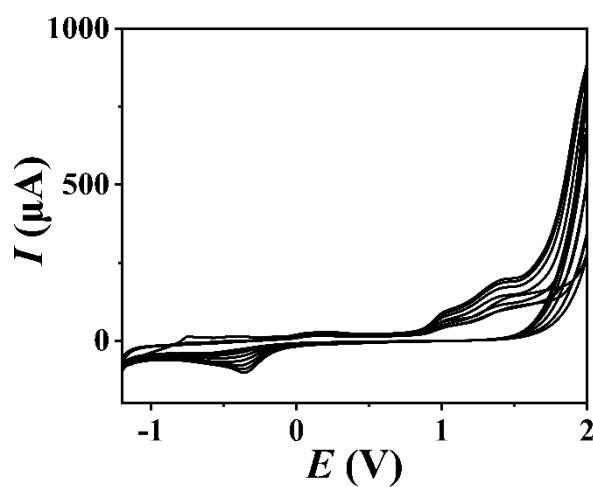

73

74 **Fig. S5.** CV curves of  $\text{MoS}_2/\text{CCNs}/\text{GCE}$  in PBS ( $\text{pH}=7.0$ ) containing 1.0 mM DXM-  
75 Cu-Phen.

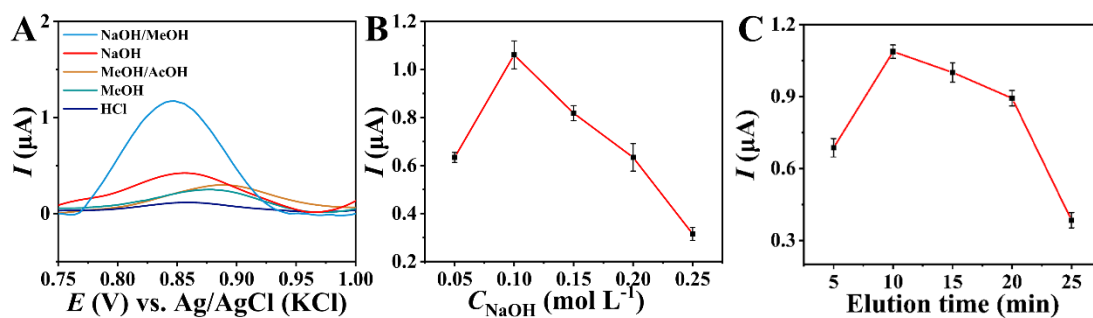

76

77 **Fig. S6.** (A) DPV curves of 10  $\mu\text{M}$  DXM at the Cu-MIP/MoS<sub>2</sub>/CCNs/GCE by using  
 78 different eluents. Effect of (B)  $C_{\text{NaOH}}$ ; (C) elution time on the peak current of 10  $\mu\text{M}$   
 79 DXM at the resulting Cu-MIP/MoS<sub>2</sub>/CCNs/GCE.

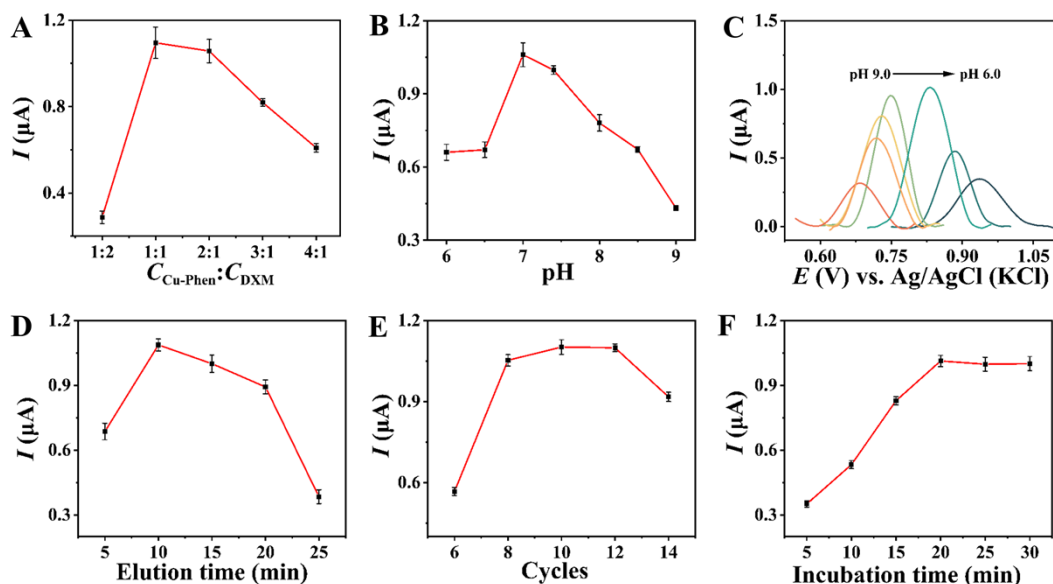

80

81 **Fig. S7.** Effect of (A) the ratio of Cu-Phen to DXM; (B) pH of phosphate buffered  
 82 solution. (C) Influence of solution pH on DPV response of 10  $\mu\text{M}$  DXM at Cu-  
 83 MIP/MoS<sub>2</sub>/CCNs/GCE. pH values: 6.0, 6.5, 7.0, 7.5, 8, 8.5 and 9.0. Effect of (D)  
 84 electropolymerization scanning rate; (E) number of electropolymerization cycles; (F)  
 85 incubation time on the peak current of 10  $\mu\text{M}$  DXM at the resulting Cu-  
 86 MIP/MoS<sub>2</sub>/CCNs/GCE.

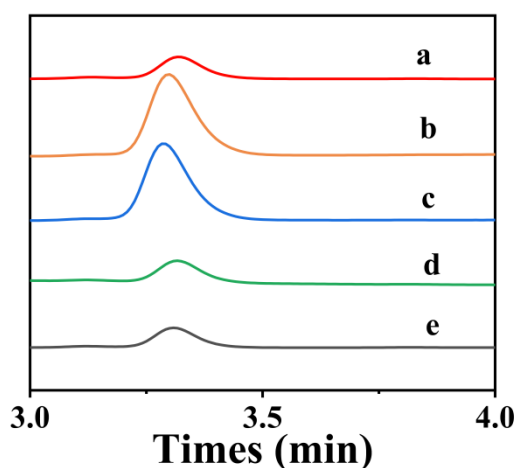

87

88 **Fig. S8.** Chromatographic diagram of (a) 10  $\mu\text{M}$  standard solution of DXM, (b) syrup  
89 simple solution, (c) table simple solution, (d) spiked serum (spiked 10  $\mu\text{M}$  DXM  
90 standard solution), (e) spiked urine (spiked 10  $\mu\text{M}$  DXM standard solution).

91

92 **Table S1.** Comparison of Cu-MIP/MoS<sub>2</sub>/CCNs/GCE with some reported  
93 electrochemical sensors for DXM detection.

| Modified electrodes               | Method        | Linear range ( $\mu\text{M}$ ) | LOD ( $\mu\text{M}$ ) | Reference |
|-----------------------------------|---------------|--------------------------------|-----------------------|-----------|
| PDDA/MWCNT/CD/PGE <sup>a</sup>    | DPV           | 2.0–600                        | 0.2                   | 2         |
| CNP/CPE <sup>b</sup>              | DPV           | 8.0–800                        | 2.9                   | 3         |
| SPCE <sup>c</sup>                 | Potentiometry | 10.0–10 <sup>4</sup>           | 6                     | 4         |
| ITO-IL-CME <sup>d</sup>           | DPV           | 0.97–620                       | 0.047                 | 5         |
| $\beta$ -CD-CWE <sup>e</sup>      | Potentiometry | 0.1–10 <sup>4</sup>            | 0.07                  | 6         |
| MIP/PVCE <sup>f</sup>             | Potentiometry | 2.8–10 <sup>3</sup>            | 1                     | 7         |
| Cu-MIP/MoS <sub>2</sub> /CCNs/GCE | DPV           | 0.1–100                        | 0.02                  | This work |

94 <sup>a</sup> PGE: pencil graphite electrode.

95 <sup>b</sup> CPE, <sup>d</sup> CWE: carbon paste electrode.

96 °SCPE: disposable screen-printed carbon electrodes.

97 °CWE: silver coated wire electrode.

98 <sup>f</sup>PVCE: Polyvinyl chloride membrane electrode.

## 99 Reference

100 1 T. Li, X. Zhang, X. Gao, J. Lin, F. Zhao and B. Zeng, *Microchim. Acta*, 2023,  
101 190.

102 2 B. Rezaei, N. Irannejad, A. A. Ensafi and M. Dinari, *IEEE Sens. J.*, 2016, 16,  
103 2219-2227.

104 3 M. Amiri, F. Rezapour and A. Bezaatpour, *J. Electroanal. Chem.*, 2014, 735, 10-  
105 18.

106 4 E. Khaled, H. N. A. Hassan, G. G. Mohamed and A. E. A. Seleim, *Drug Test.*  
107 *Anal.*, 2010, 2, 424-429.

108 5 M. P. Kingsley, P. A. Sathe and A. K. Srivastava, *J. Indian Chem. Soc.*, 2017, 94,  
109 681-698.

110 6 E. Khaled, M. S. Kamel, H. N. A. Hassan and H. Y. Aboul-Enein, *J. Electroanal.*  
111 *Chem.*, 2011, 661, 239-244.

112 7 E. H. El-Naby and A. H. Kamel, *Mater. Sci. Eng. C.*, 2015, 54, 217-224.
